# Supplementary material for: TBC1D1 represses glioma progression by altering the integrity of the cytoskeleton
Source: publisher site journal article supplement (doi:10.18632/aging.205377), 2024-01-05
Supplement: Supplementary file [file aging-v16i1-205377-supplementary-material-SD1.pdf]

## SUPPLEMENTARY FIGURE

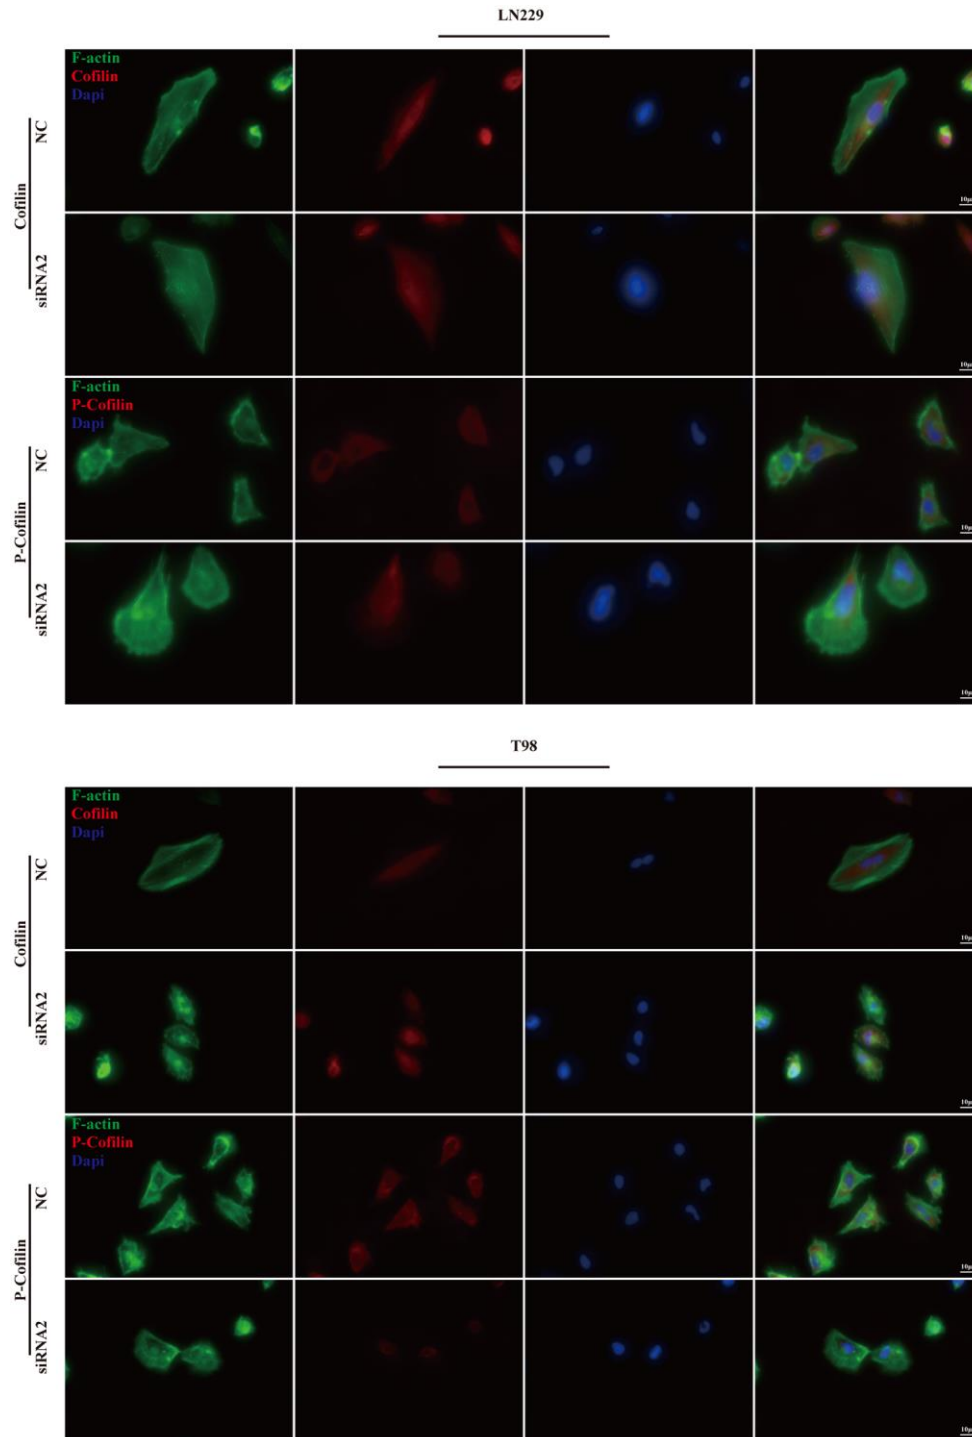

Supplementary Figure 1. Intracellular location of cofilin and p-cofilinSer3 in T98MG and LN229 (Scale bar = 10 μm).
